# Supplementary material
Source: HighWire-hosted journal article supplement (https://diabetes.diabetesjournals.org/content/suppl/2006/08/29/55.9.2649)
Supplement: PG2649onlineappendixTableS2.pdf [file PG2649onlineappendixTableS2.pdf]

Table S2A and B. Linkage disequilibrium measures D' (lower triangle) and r<sup>2</sup> (upper triangle) for *TCF7L2* SNPs in controls (A) and cases (B)

**A: Controls**

|            | rs11196175 | rs7079711 | rs11196181 | rs17747324 | rs7901695 | rs7903146 | rs7896811 | rs11196192 | rs11196199 | rs17685538 | rs7895340 | rs11196205 | rs12255372 | rs11196213 | rs11196228 | rs290494 | rs1555485 |
|------------|------------|-----------|------------|------------|-----------|-----------|-----------|------------|------------|------------|-----------|------------|------------|------------|------------|----------|-----------|
| rs11196175 |            |           |            |            |           |           |           |            |            |            |           |            |            |            |            |          |           |
| rs7079711  | .01        |           |            |            |           |           |           |            |            |            |           |            |            |            |            |          |           |
| rs11196181 | .54        | .60       |            |            |           |           |           |            |            |            |           |            |            |            |            |          |           |
| rs17747324 | .57        | .16       | 1.00       |            |           |           |           |            |            |            |           |            |            |            |            |          |           |
| rs7901695  | .49        | .16       | 1.00       | .99        |           |           |           |            |            |            |           |            |            |            |            |          |           |
| rs7903146  | .54        | .78       | 1.00       | .80        | 1.00      |           |           |            |            |            |           |            |            |            |            |          |           |
| rs7896811  | .07        | .30       | .98        | 1.00       | 1.00      | .97       |           |            |            |            |           |            |            |            |            |          |           |
| rs11196192 | .36        | .66       | 1.00       | .99        | .90       | .89       | 1.00      |            |            |            |           |            |            |            |            |          |           |
| rs11196199 | .14        | .26       | .94        | .51        | .63       | .59       | .98       | 1.00       |            |            |           |            |            |            |            |          |           |
| rs17685538 | .48        | .28       | 1.00       | 1.00       | 1.00      | 1.00      | 1.00      | 1.00       | 1.00       |            |           |            |            |            |            |          |           |
| rs7895340  | .76        | .39       | .93        | .97        | .99       | .99       | .98       | 1.00       | 1.00       | 1.00       |           |            |            |            |            |          |           |
| rs11196205 | .75        | .38       | .93        | .97        | .99       | .99       | .98       | 1.00       | .99        | 1.00       | 1.00      |            |            |            |            |          |           |
| rs12255372 | .57        | .92       | 1.00       | .69        | .92       | .91       | 1.00      | .98        | 1.00       | 1.00       | .97       | 1.00       |            |            |            |          |           |
| rs11196213 | .59        | .18       | .92        | .54        | .64       | .56       | .89       | 1.00       | .90        | .96        | .83       | .84        | .70        |            |            |          |           |
| rs11196228 | .35        | .02       | .02        | .79        | 1.00      | 1.00      | .16       | .02        | .27        | .46        | .38       | .39        | .68        | .48        |            |          |           |
| rs290494   | .67        | .21       | .16        | .16        | .02       | .26       | .05       | .17        | .04        | .50        | .17       | .17        | .14        | .14        | 1.00       |          |           |
| rs1555485  | .50        | .17       | .63        | .70        | .42       | .64       | .14       | .03        | .12        | .10        | .03       | .02        | .57        | .03        | .85        | .06      |           |

**B: Cases**

|            | rs11196175 | rs7079711 | rs11196181 | rs17747324 | rs7901695 | rs7903146 | rs7896811 | rs11196192 | rs11196199 | rs17685538 | rs7895340 | rs11196205 | rs12255372 | rs11196213 | rs11196228 | rs290494 | rs1555485 |
|------------|------------|-----------|------------|------------|-----------|-----------|-----------|------------|------------|------------|-----------|------------|------------|------------|------------|----------|-----------|
| rs11196175 |            |           |            |            |           |           |           |            |            |            |           |            |            |            |            |          |           |
| rs7079711  | .01        |           |            |            |           |           |           |            |            |            |           |            |            |            |            |          |           |
| rs11196181 | .48        | .76       |            |            |           |           |           |            |            |            |           |            |            |            |            |          |           |
| rs17747324 | .60        | .25       | 1.00       |            |           |           |           |            |            |            |           |            |            |            |            |          |           |
| rs7901695  | .55        | .29       | 1.00       | .99        |           |           |           |            |            |            |           |            |            |            |            |          |           |
| rs7903146  | .55        | .69       | 1.00       | .89        | .99       |           |           |            |            |            |           |            |            |            |            |          |           |
| rs7896811  | .06        | .33       | .99        | 1.00       | 1.00      | 1.00      |           |            |            |            |           |            |            |            |            |          |           |
| rs11196192 | .24        | 1.00      | 1.00       | .99        | .89       | .82       | 1.00      |            |            |            |           |            |            |            |            |          |           |
| rs11196199 | .09        | .29       | .96        | .57        | .64       | .61       | .98       | 1.00       |            |            |           |            |            |            |            |          |           |
| rs17685538 | .69        | .32       | 1.00       | 1.00       | 1.00      | 1.00      | 1.00      | .98        | 1.00       |            |           |            |            |            |            |          |           |
| rs7895340  | .81        | .29       | .95        | .99        | .99       | .99       | .98       | 1.00       | 1.00       | 1.00       |           |            |            |            |            |          |           |
| rs11196205 | .81        | .29       | .95        | .99        | .99       | .98       | 1.00      | 1.00       | 1.00       | 1.00       | 1.00      |            |            |            |            |          |           |
| rs12255372 | .59        | .94       | 1.00       | .70        | .93       | .93       | 1.00      | 1.00       | 1.00       | 1.00       | .98       | .99        |            |            |            |          |           |
| rs11196213 | .59        | .08       | .96        | .57        | .66       | .62       | .87       | 1.00       | .90        | .99        | .83       | .83        | .73        |            |            |          |           |
| rs11196228 | .14        | .00       | .12        | .47        | .46       | .38       | .04       | .01        | .02        | 1.00       | .02       | .03        | .01        | .16        |            |          |           |
| rs290494   | .68        | .09       | .16        | .32        | .28       | .52       | .15       | .01        | .24        | .65        | .22       | .21        | .43        | .26        | .84        |          |           |
| rs1555485  | .50        | .11       | .68        | .74        | .57       | .64       | .11       | .03        | .11        | .19        | .11       | .10        | .57        | .09        | .53        | .15      |           |
